# Supplementary material
Source: PubMed Central journal article supplement (PMC7965599)
Supplement: 3141_figures.pdf [file 3141_figures.pdf]

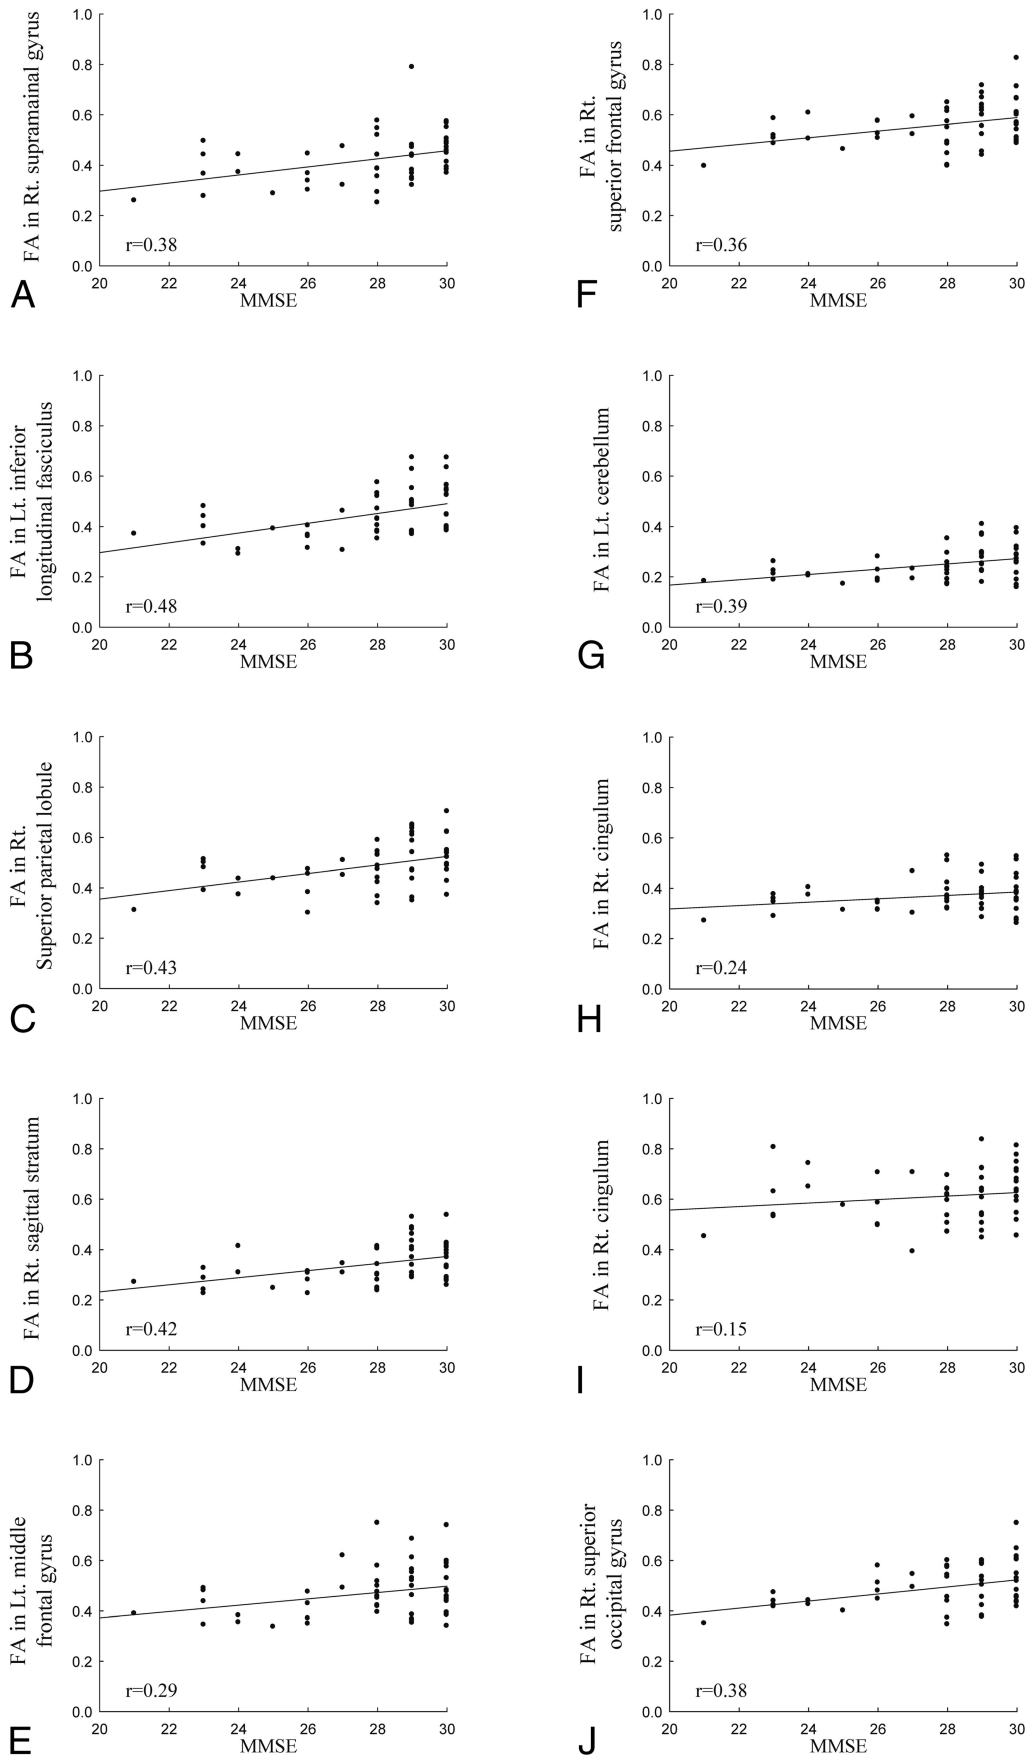

**On-line Fig 1.** Graphs showing correlations between FA values and MMSE scores in each region of the brain. The identifying label for each graph (eg, A) is equivalent to the anatomic location label in Table 3.

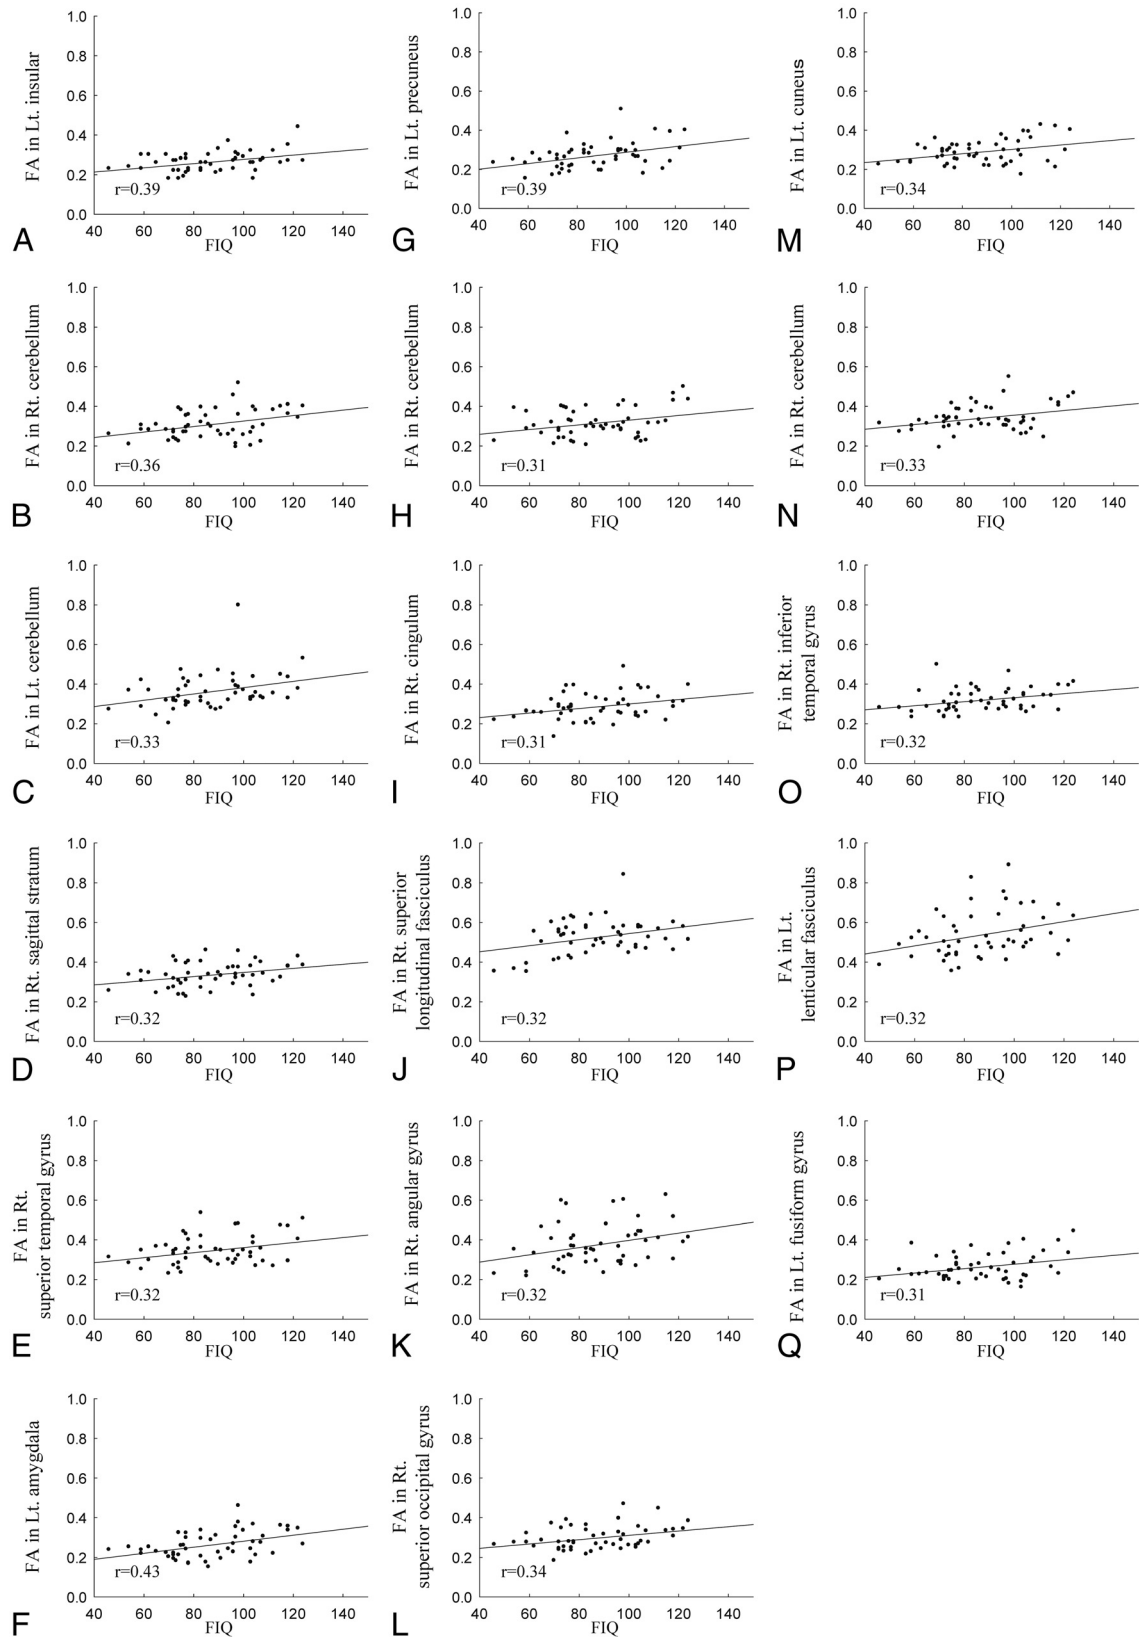

**On-line Fig 2.** Graphs showing correlations between FA values and FIQ scores in each region of the brain. The identifying label for each graph (eg, A) is equivalent to the anatomic location label in Table 4.
